# Supplementary material for: DcR3 gene polymorphisms are associated with sporadic breast infiltrating ductal carcinoma in Northeast Chinese women
Source: PubMed Central journal article supplement (PMC5295404; doi:10.18632/oncotarget.11153), 2016-08-09
Supplement: oncotarget-07-57970-s001.pdf [file oncotarget-07-57970-s001.pdf]

# DcR3 gene polymorphisms are associated with sporadic breast infiltrating ductal carcinoma in Northeast Chinese women

## Supplementary Materials

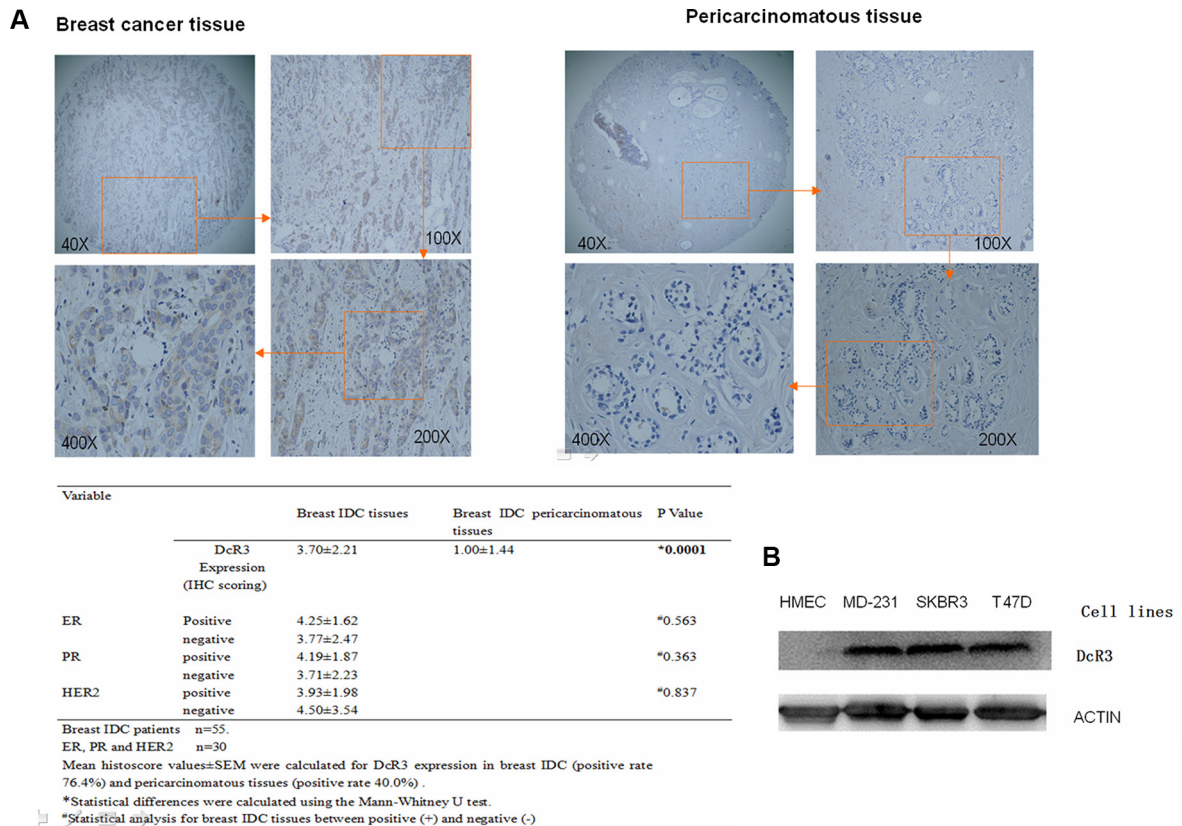

**Supplemental Figure S1: Evaluation of DcR3 expression in breast cancer.** DcR3 was detected in paraffin-embedded tissue sections using IHC analysis (A). IHC staining scores are reported as means ± SE. The Mann-Whitney *U* test was used to analyze *DcR3* expression differences between IDC and pericarcinomatous (PC) tissues ( $3.70 \pm 2.21$  to  $1.00 \pm 1.44$ ).  $P = 0.0001$ . DcR3 was detected in HMEC and breast cancer cell lines via western blotting (B). DcR3 is overexpressed in breast cancer cell lines as compared to HMECs. Experiments were repeated 4 times.
